# Supplementary material
Source: publisher figshare collection journal article supplement (https://geolsoc.figshare.com/ndownloader/files/21902751)
Supplement: Supplementary file 1 [file 21902751]

## Sheet: Table 1
Table 1. Guaging station information and summary of peak discharge and rainfall of the Storm Frank flood
Station name and no.	Grid Reference (NGR)	Station level above datum (m)	Catchment area (km^2)	Year Record Began	Peak Discharge (m^3/s)	Peak time on 30 Dec 2015 (GMT)	Total rainfall 29-30 Dec 2015 (mm)
Dee at Mar Lodge (12007)	NO090788, 89522	331.9	289	1982	401.79	900	75.3
Dee at Polhollick (12003)	NO34395, 96531	216.7	690	1975	898.05	1145	79.2
Gairn at Invergairn (12006)	NO35231, 97050	217.7	150	1978	115.75	1100	61.1
Muick at Invermuick (12005)	NO36423, 94759	200.7	110	1976	236.6	1045	103
Dee at Woodend (12001)	NO63482, 95613	70.5	1370	1929	1362.55	1600	69.8
Feugh at Heugh Head (12008)	NO68703, 92800	69	229	1985	287.15	1300	50.6
Dee at Park (12002)	NO79739, 98317	22.6	1844	1972	1282.85*	1800	61.9
Contains SEPA data © Scottish Environment Protection Agency and database right 2019. All rights reserved. The confidence of estimates can be very low at the lower and upper extremes of the flow range and varies from site to site. This is because such flow conditions can exceed the design limits of the measuring infrastructure. In addition, due to the rare and flashy nature of extreme flows, captu…
